# Supplementary material
Source: PubMed Central journal article supplement (PMC6643669)
Supplement: ao7b01315_si_001.pdf [file ao7b01315_si_001.pdf]

## Supporting Information

### Hyaluronic Acid Layered Chimeric Nanoparticle: Targeting MAPK-PI3K Signaling Hub in Colon Cancer Cells

Sandeep Palvai,<sup>†</sup> Meenu Mahesh Kuman,<sup>†</sup> Poulomi Sengupta,<sup>ψ</sup> Sudipta Basu<sup>†\*</sup>

<sup>†</sup> Indian Institute of Science Education and Research (IISER) Pune, Department of Chemistry, Dr. Homi Bhabha Road, Pashan, Pune, India, 411008

<sup>ψ</sup> CSIR-National Chemical Laboratory, Physical Chemistry Division, Dr. Homi Bhabha Road, Pashan, Pune, India, 411008 and Academy of Scientific & Innovative Research (AcSIR)

\* Corresponding author: Email: [sudipta.basu@iiserpune.ac.in](mailto:sudipta.basu@iiserpune.ac.in)

#### Content:

**Page S2.** Characterization of cholesterol-AZD6244 and cholesterol-FITC conjugates.

**Page S3.** <sup>1</sup>H and <sup>13</sup>C NMR spectra of cholesterol-AZD6244 conjugate (Figure S1, S2).

**Page S4.** <sup>19</sup>F NMR and MALDI-TOF spectra of cholesterol-AZD6244 conjugate (Figure S3, S4).

**Page S5.** DLS, zeta potential and EDX of chimeric nanoparticle (Figure S5, S6).

**Page S6.** Drug calibration graph, loading and stability of HA-CNPs (Figure S7, S8).

**Page S7.** Synthetic scheme and <sup>1</sup>H NMR spectra of cholesterol-FITC conjugate (Figure S9, S10).

**Page S8.** <sup>13</sup>C NMR and MALDI-TOF spectra of cholesterol-FITC conjugate (Figure S11, S12).

**Page S9.** DLS of FITC-CNP, HA-FITC-CNP and drug release profile of HA-CNPs (Figure S13, S14).

**Page S10.** Quantification of fluorescence intensity and protein expression (Figure S15, S16).

**Page S11.** MTT assay and volume colocalization quantification from CLSM (Figure S17, Table S1).

### Characterization of cholesterol-AZD6244 conjugate (3):

**<sup>1</sup>H NMR (400 MHz, CDCl<sub>3</sub>):**  $\delta$  = 8.91 (s, 1H), 8.23 (s, 1H), 8.00 (s, 1H), 8.05 (s, 1H), 7.49 (d,  $J$  = 2.2 Hz, 1H), 7.16-7.18 (dd,  $J$  = 8.8, 2.2 Hz, 1H), 6.55 – 6.52 (m, 1H), 5.35 (s, 1H), 4.59 (s, 2H), 4.23 (m, 2H), 3.93 (s, 3H), 2.66 (s, 2H), 2.39 (s, 1H), 2.29 (d,  $J$  = 7.6 Hz, 2H), 2.01– 1.8 (m, 4H), 1.57 – 1.41 (m, 14H), 1.25 (m, 3H), 1.11 (m, 7H), 0.99 (s, 4H), 0.85 – 0.92 (m, 10H), 0.67 (s, 3H).

**<sup>13</sup>C NMR (101 MHz, CDCl<sub>3</sub>):**  $\delta$  = 172.34, 147.37, 139.70, 139.62, 131.69, 130.23, 124.96, 122.97, 122.46, 117.99, 116.26, 116.22, 111.29, 109.52, 77.16, 74.88, 73.98, 62.37, 59.67, 56.83, 56.27, 50.15, 42.46, 39.86, 39.66, 38.30, 38.20, 37.07, 36.72, 36.33, 35.94, 32.04, 31.98, 31.78, 31.39, 29.85, 29.64, 29.61, 28.37, 28.17, 27.87, 24.42, 23.97, 22.97, 22.71, 21.16, 19.43, 18.86, 11.57.

**<sup>19</sup>F NMR (376 MHz, CDCl<sub>3</sub>):**  $\delta$  = -129.16

**MALDI-TOF (m/z):** Calculated mass = 924.3604 for C<sub>48</sub>H<sub>63</sub>BrClFN<sub>4</sub>O<sub>6</sub>, observed = 925.4789 for C<sub>48</sub>H<sub>64</sub>BrClFN<sub>4</sub>O<sub>6</sub> [M+H]<sup>+</sup>.

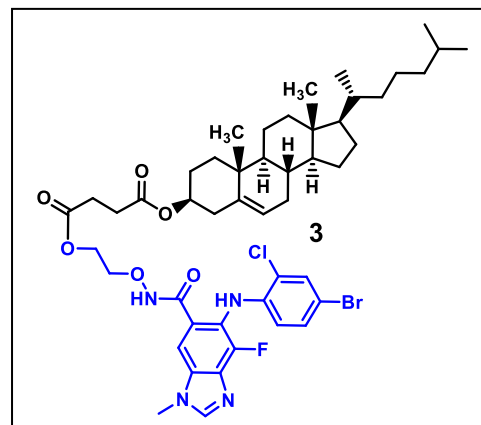

### Characterization of FITC-Cholesterol conjugate (8):

**<sup>1</sup>H NMR (400 MHz, MeOD):**  $\delta$  = 7.80 (s, 1H), 7.58 (d,  $J$  = 7.7 Hz, 1H), 7.16 – 7.23 (m,  $J$  = 16.4, 8.8 Hz, 3H), 6.57 (s, 1H), 6.55 (s, 3H), 5.22 (s, 1H), 3.81 – 3.68 (m, 2H), 3.46 – 3.35 (m,  $J$  = 6.5 Hz, 2H), 2.23 (s, 1H), 2.02 (s, 1H), 1.96 – 1.77 (m, 4H), 1.78 – 1.64 (m, 2H), 1.63 – 1.47 (m,  $J$  = 6.9 Hz, 3H), 1.47 – 1.33 (m, 8H), 1.33 – 1.24 (m, 3H), 1.22 – 1.08 (m, 5H), 0.99 – 0.84 (m, 14H), 0.68 (s, 3H).

**<sup>13</sup>C NMR (101 MHz, MeOD):**  $\delta$  = 182.81, 180.80, 173.47, 160.16, 160.11, 141.44, 132.93, 132.80, 126.46, 126.36, 123.67, 123.52, 123.49, 114.46, 114.37, 104.60, 104.51, 100.95, 75.74, 58.59, 58.19, 57.83, 51.71, 49.00, 47.21, 45.12, 43.69, 41.31, 40.90, 39.95, 38.31, 37.76, 37.60, 37.37, 35.52, 33.99, 33.31, 33.02, 29.53, 29.35, 25.49, 25.24, 24.36, 23.40, 23.15, 22.30, 19.93, 19.48, 12.50.

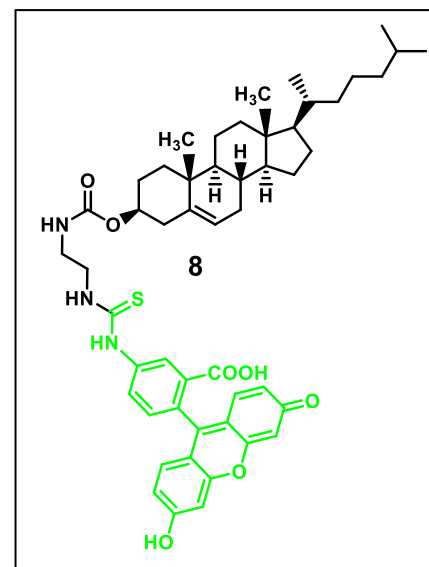

**MALDI-TOF (m/z):** Calculated mass = 861.4387 for C<sub>51</sub>H<sub>63</sub>N<sub>3</sub>O<sub>7</sub>S, observed = 862.73 for C<sub>51</sub>H<sub>64</sub>N<sub>3</sub>O<sub>7</sub>S [M+H]<sup>+</sup>.

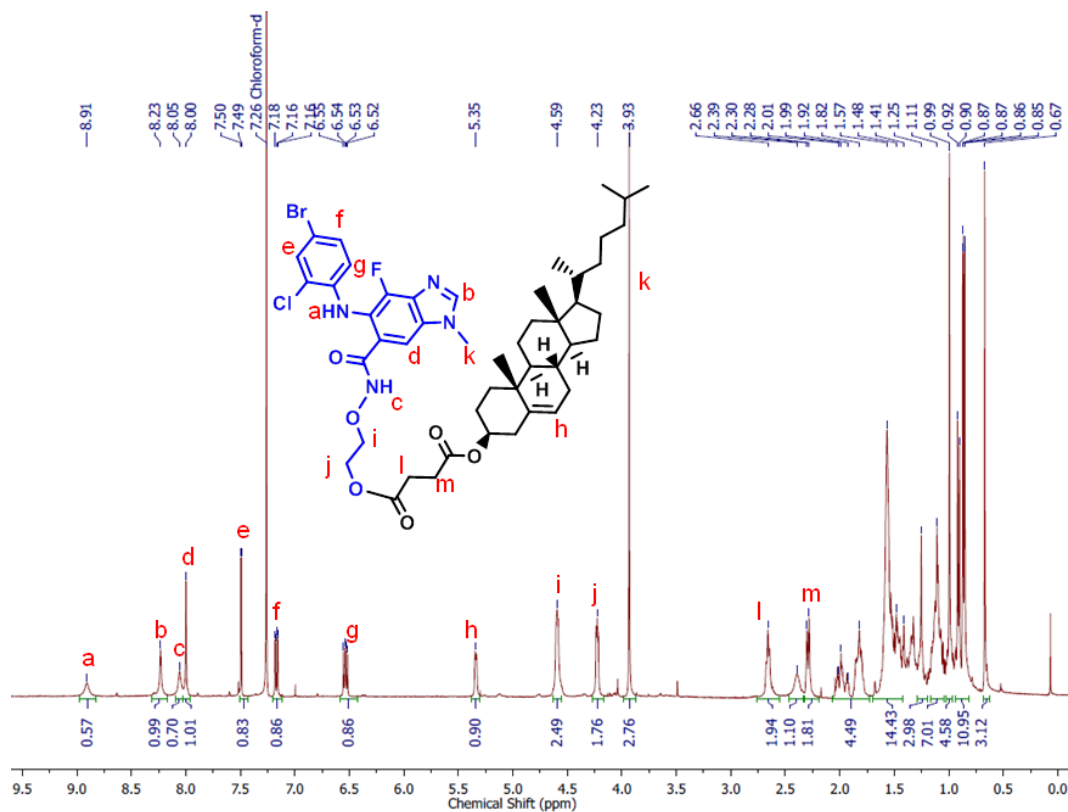

Figure S1: <sup>1</sup>H NMR spectra of cholesterol-AZD6244 conjugate (3).

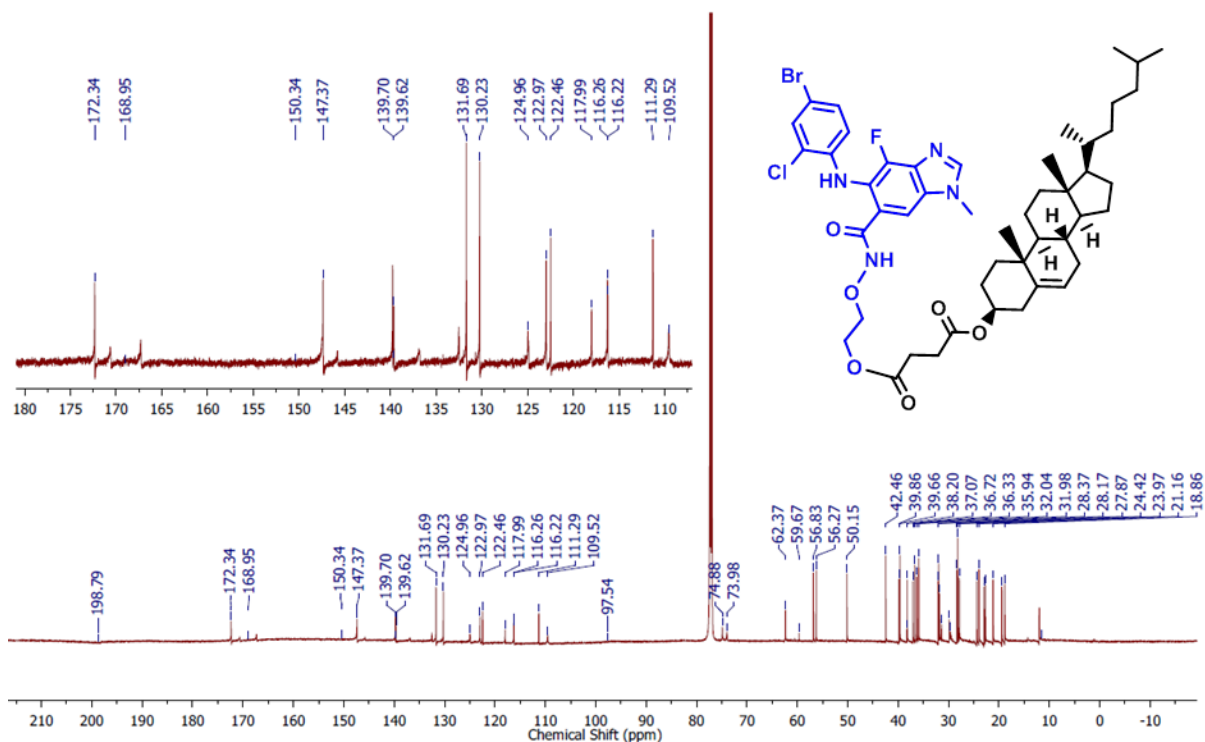

Figure S2: <sup>13</sup>C NMR spectra of cholesterol-AZD6244 conjugate (3).

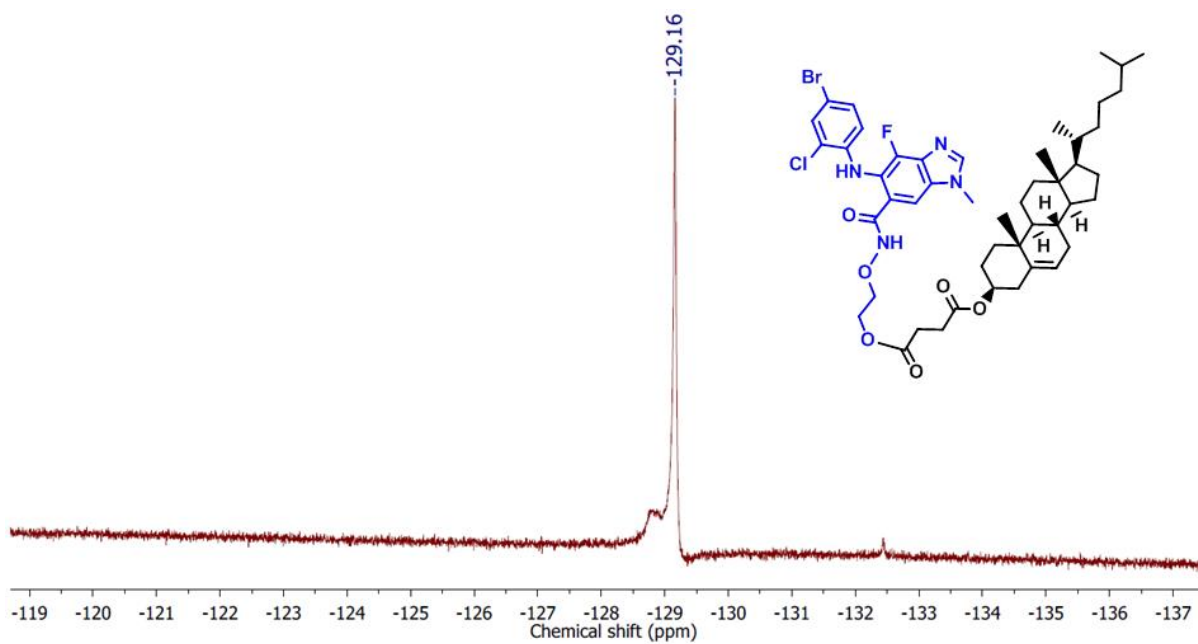

**Figure S3:**  $^{19}\text{F}$  NMR spectra of cholesterol-AZD6244 conjugate (3).

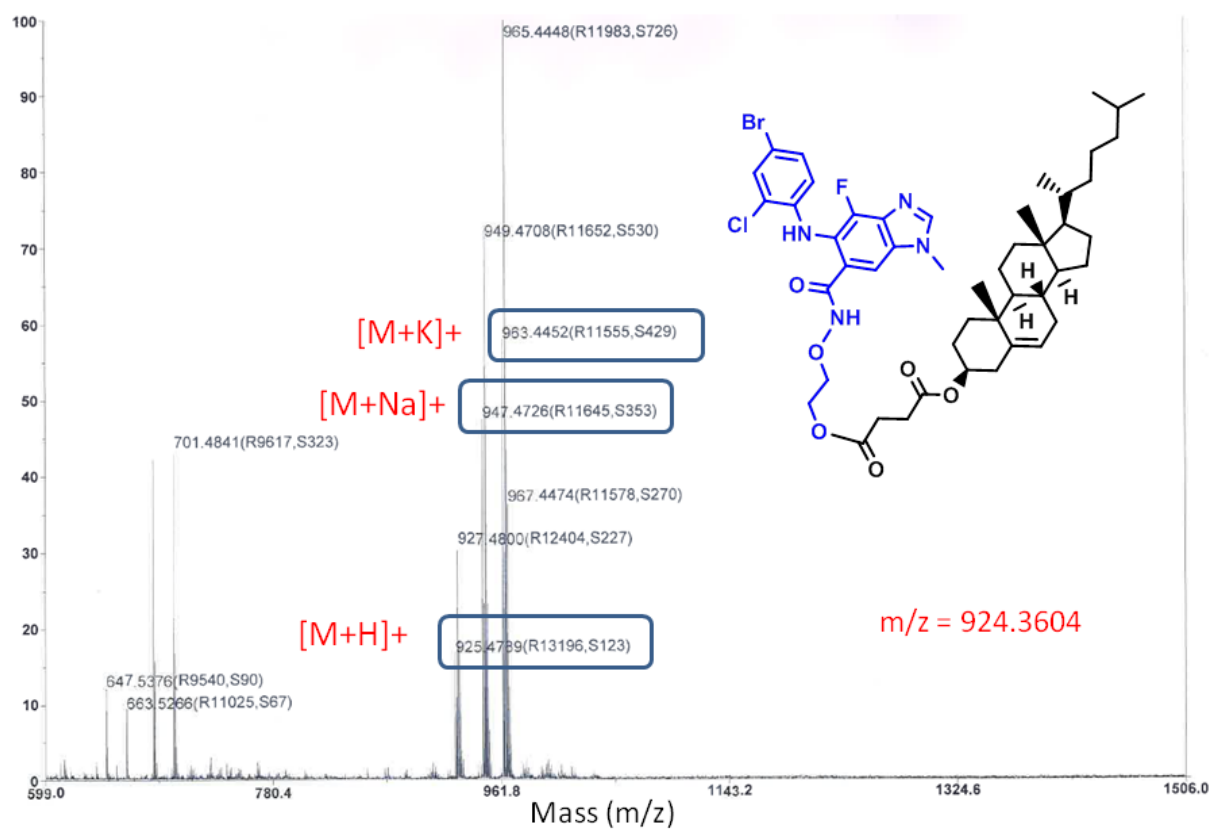

**Figure S4:** MALDI-TOF spectra of cholesterol-AZD6244 conjugate (3).

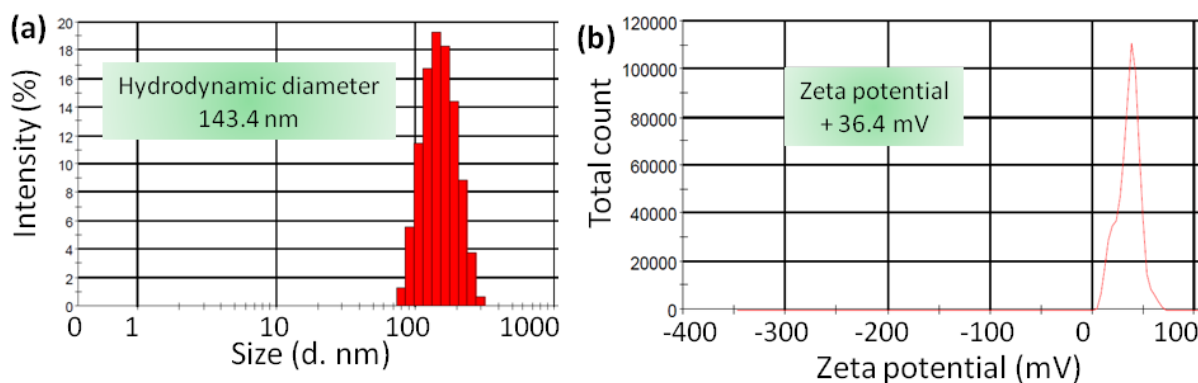

**Figure S5:** (a) Hydrodynamic diameter and (b) zeta potential of chimeric nanoparticle (CNP) determined by dynamic light scattering (DLS).

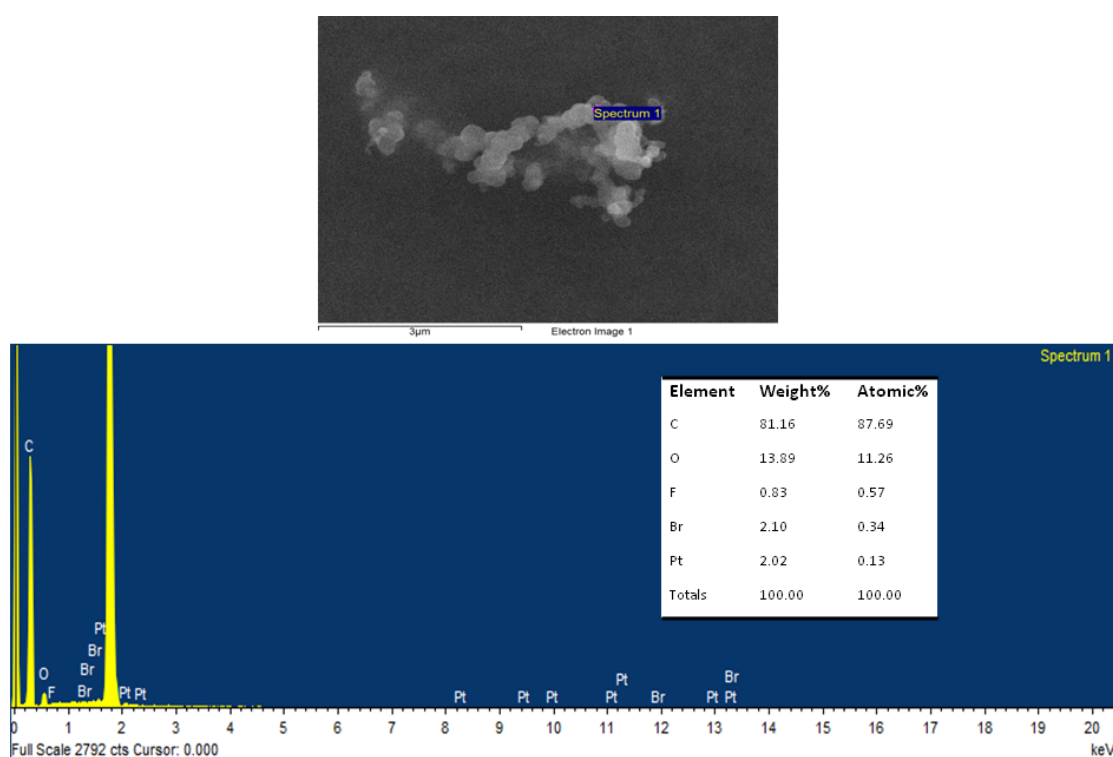

**Figure S6:** Energy-dispersive X-ray spectroscopy (EDX) of HA-CNPs to validate the presence of AZD6244 and cisplatin in the same particle.

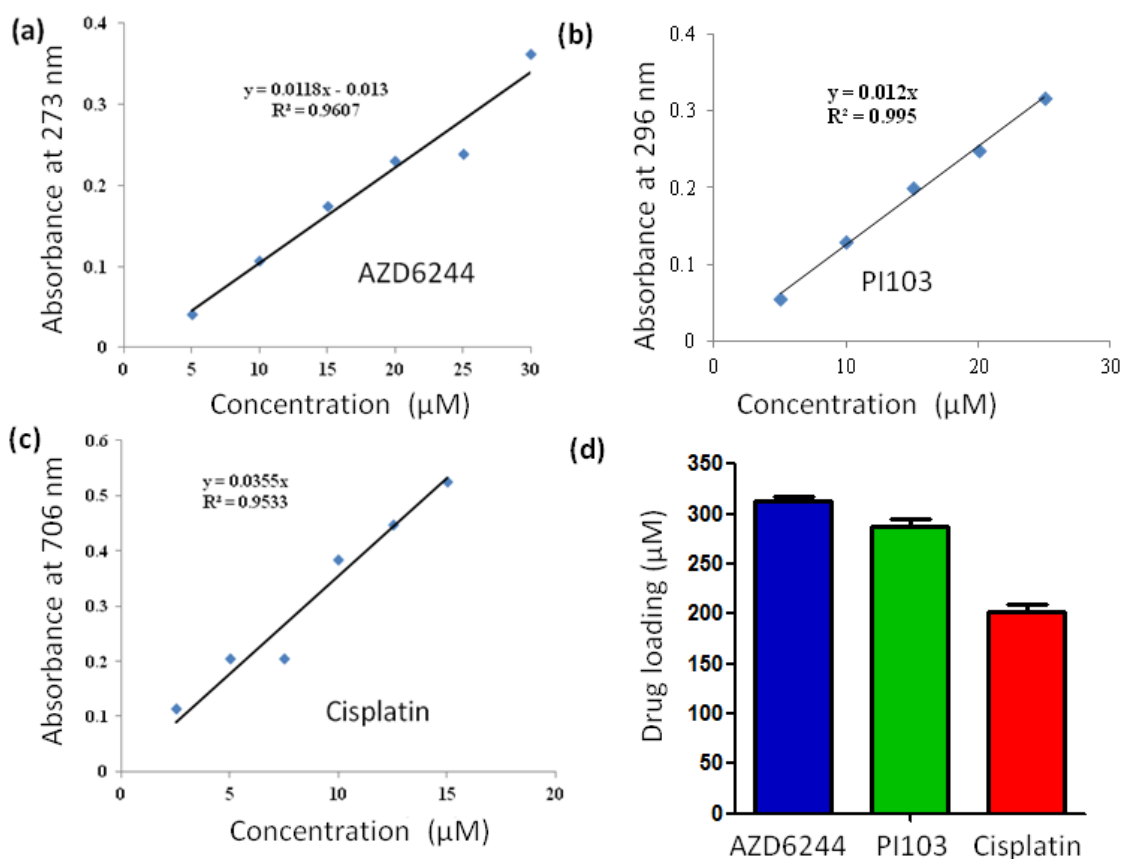

**Figure S7:** (a-c) Concentration versus absorbance calibration graph of AZD6244, PI103 and cisplatin at  $\lambda_{\text{max}} = 273 \text{ nm}$ ,  $296 \text{ nm}$  and  $706 \text{ nm}$  respectively from UV-Vis spectroscopy. (d) Loading of AZD6244, PI103 and cisplatin in HA-CNPs determined by UV-Vis spectroscopy from concentration versus absorbance calibration graph.

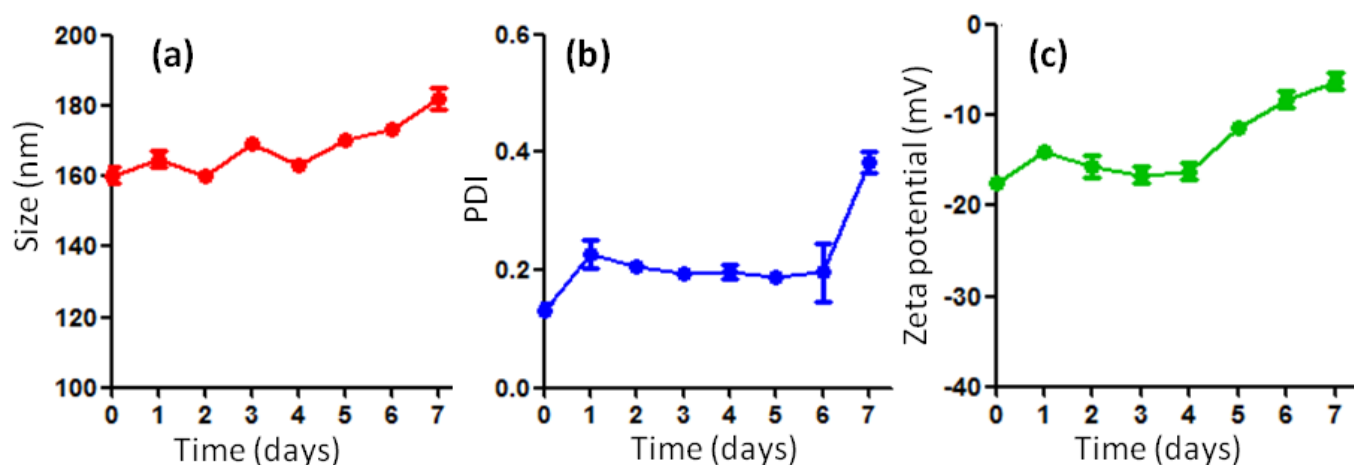

**Figure S8:** Stability of HA-CNPs was evaluated through DLS by measuring (a) hydrodynamic diameter (b) poly-dispersity index (PDI) and (c) surface charge in DMEM media containing 10 % FBS at  $37 \text{ }^\circ\text{C}$  over 7 days.

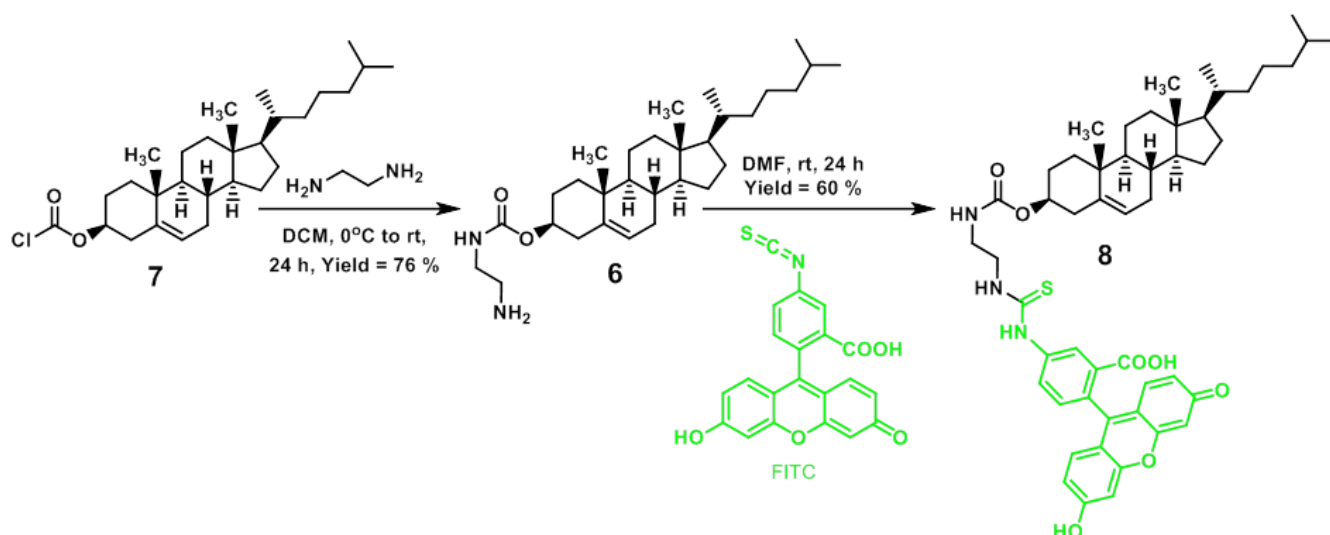

**Figure S9:** Synthetic scheme of FITC-cholesterol conjugate (8).

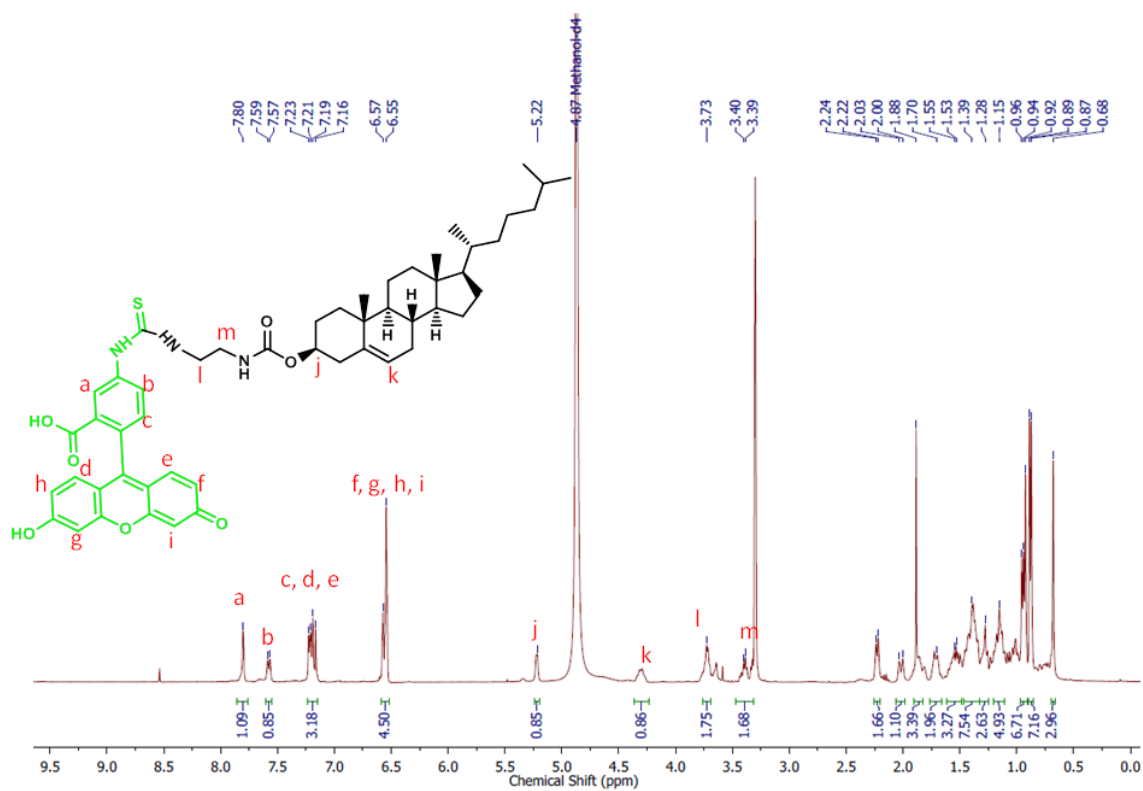

**Figure S10:**  $^1\text{H}$  NMR spectra of FITC-cholesterol conjugate (8).

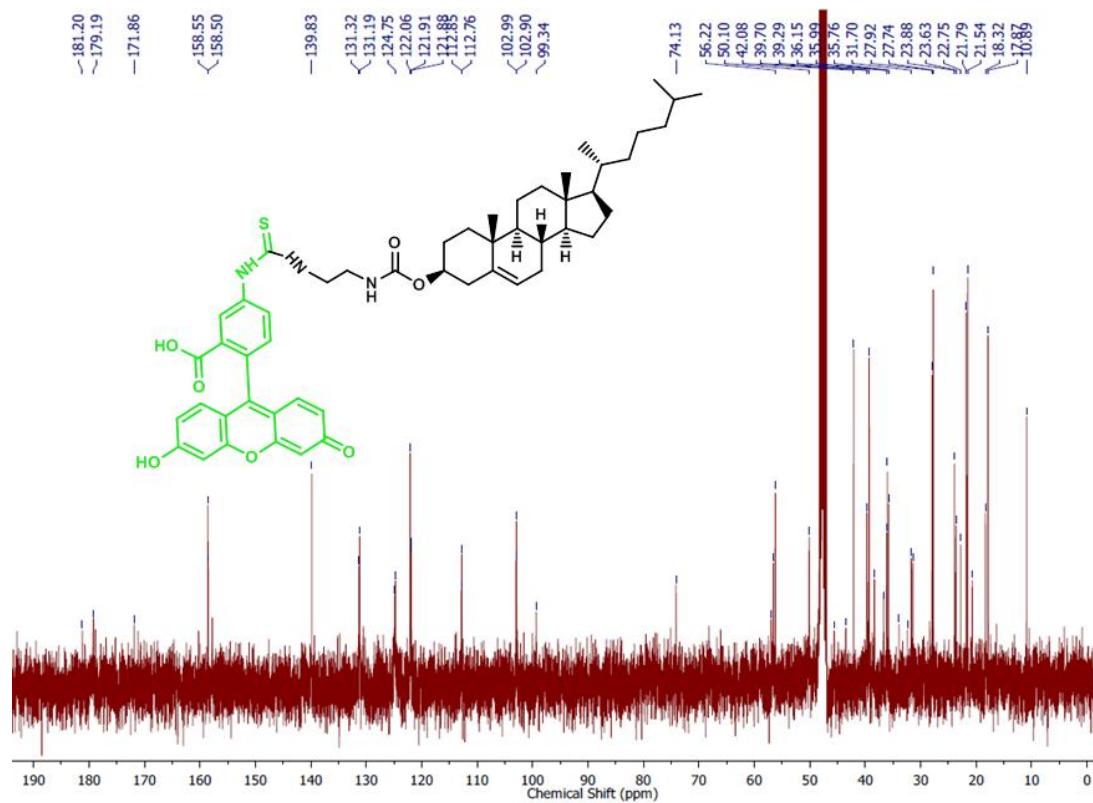

**Figure S11:**  $^{13}\text{C}$  NMR spectra of FITC-cholesterol conjugate (8).

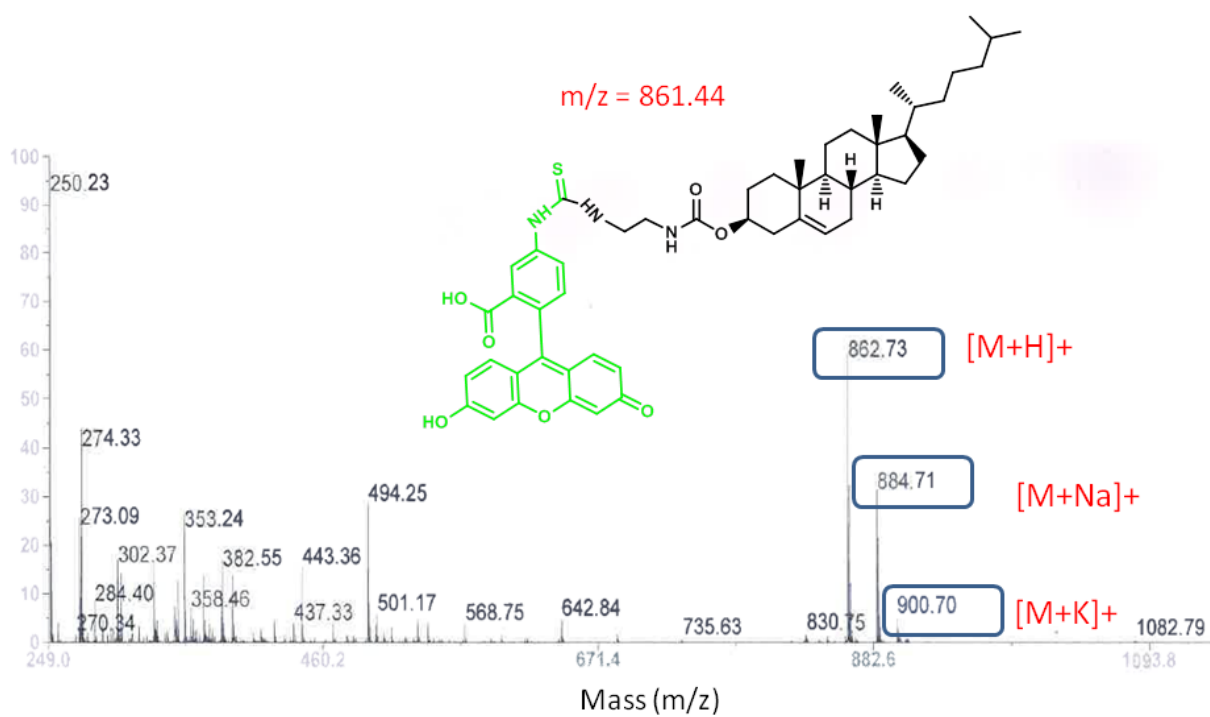

**Figure S12:** MALDI-TOF spectra of FITC-cholesterol conjugate (8).



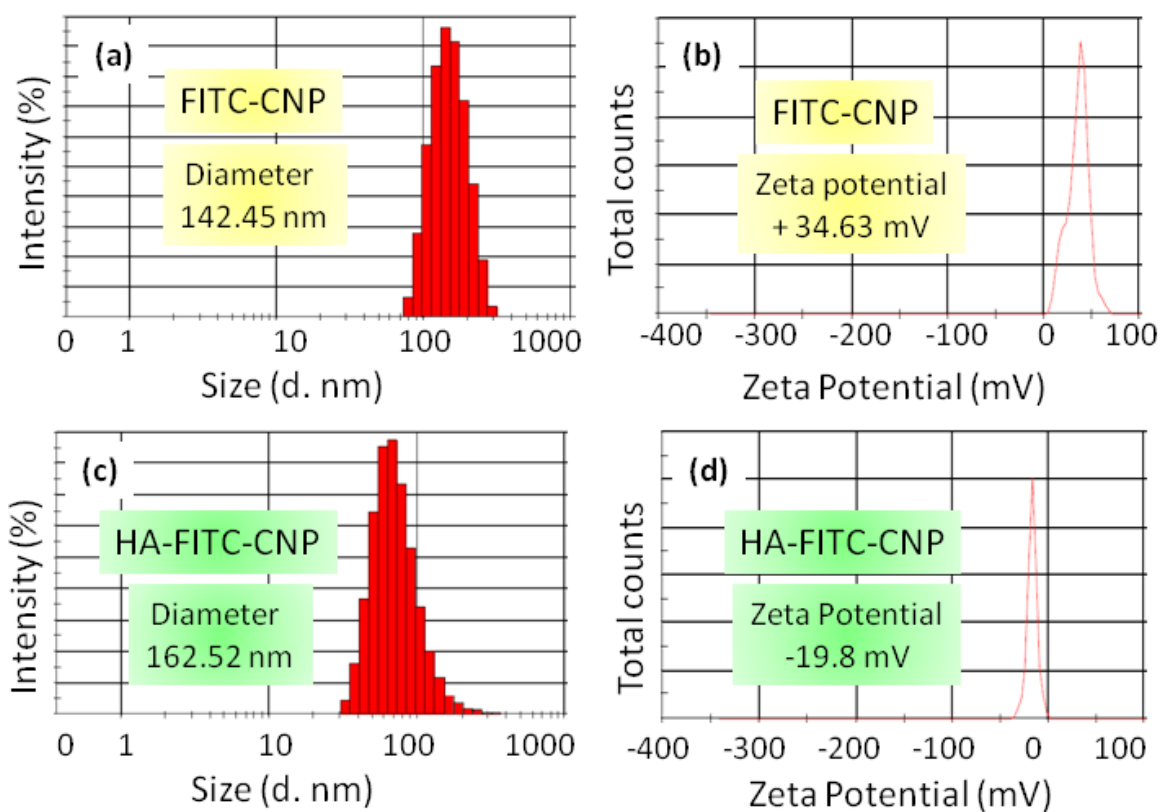

**Figure S13:** (a, c) Hydrodynamic diameter of FITC-CNP and HA-FITC-CNP; (b,d) zeta potential of FITC-CNP and HA-FITC-CNP determined by DLS measurements.

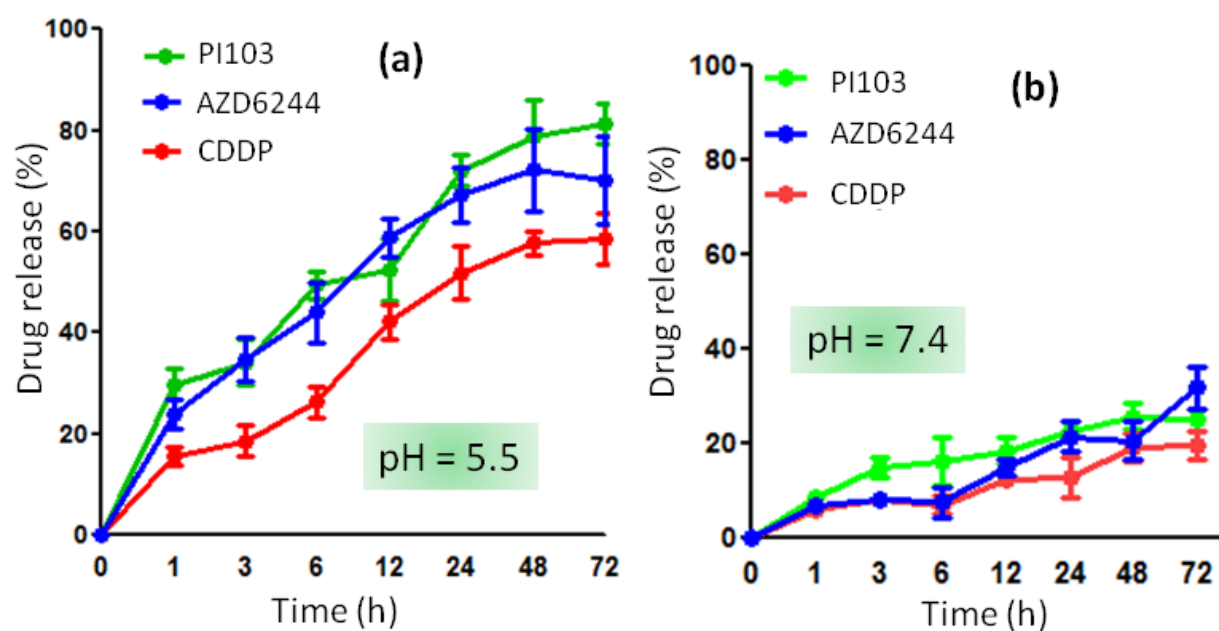

**Figure S14:** Time dependent release of AZD6244, PI103 and cisplatin from HA-CNP at (a) pH = 5.5 and (b) pH = 7.4.

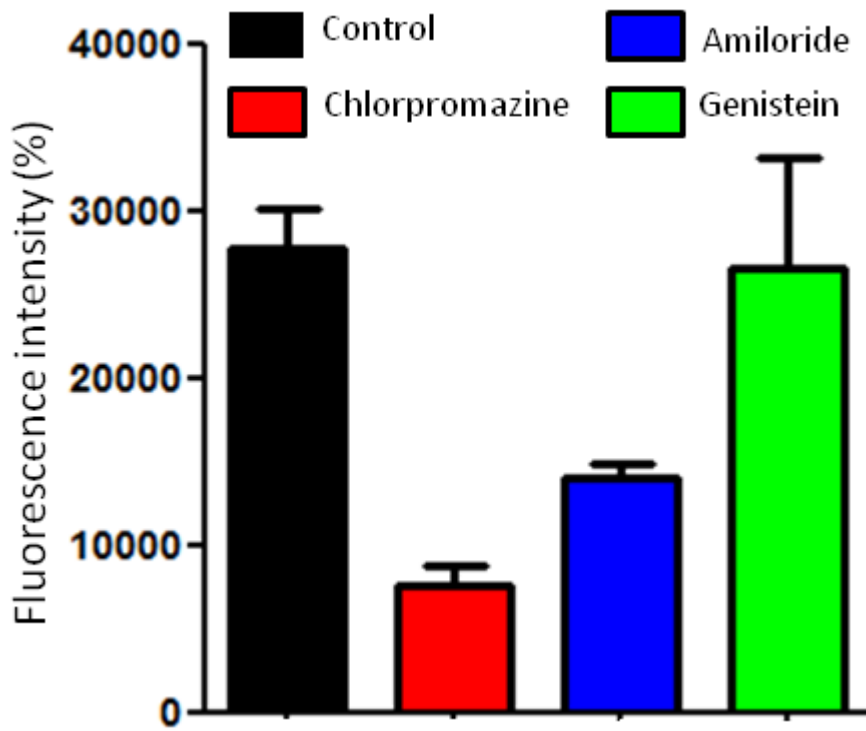

**Figure S15:** Quantification of green fluorescence intensity in HCT-116 cells after treatment with endocytosis inhibitors followed by HA-FITC-CNPs, determined from CLSM.

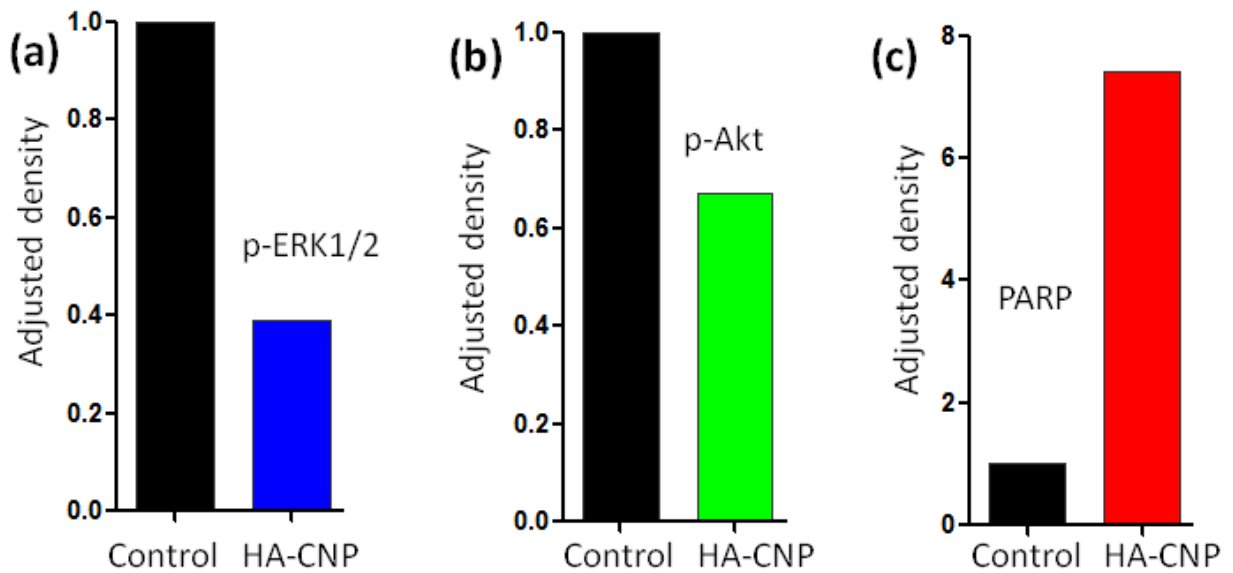

**Figure S16:** Quantification of the expression of (a) *p*-ERK1/2, (b) *p*-Akt and (c) PARP from Western blot analysis in HCT-116 cells after treatment with HA-CNPs for 24 h.

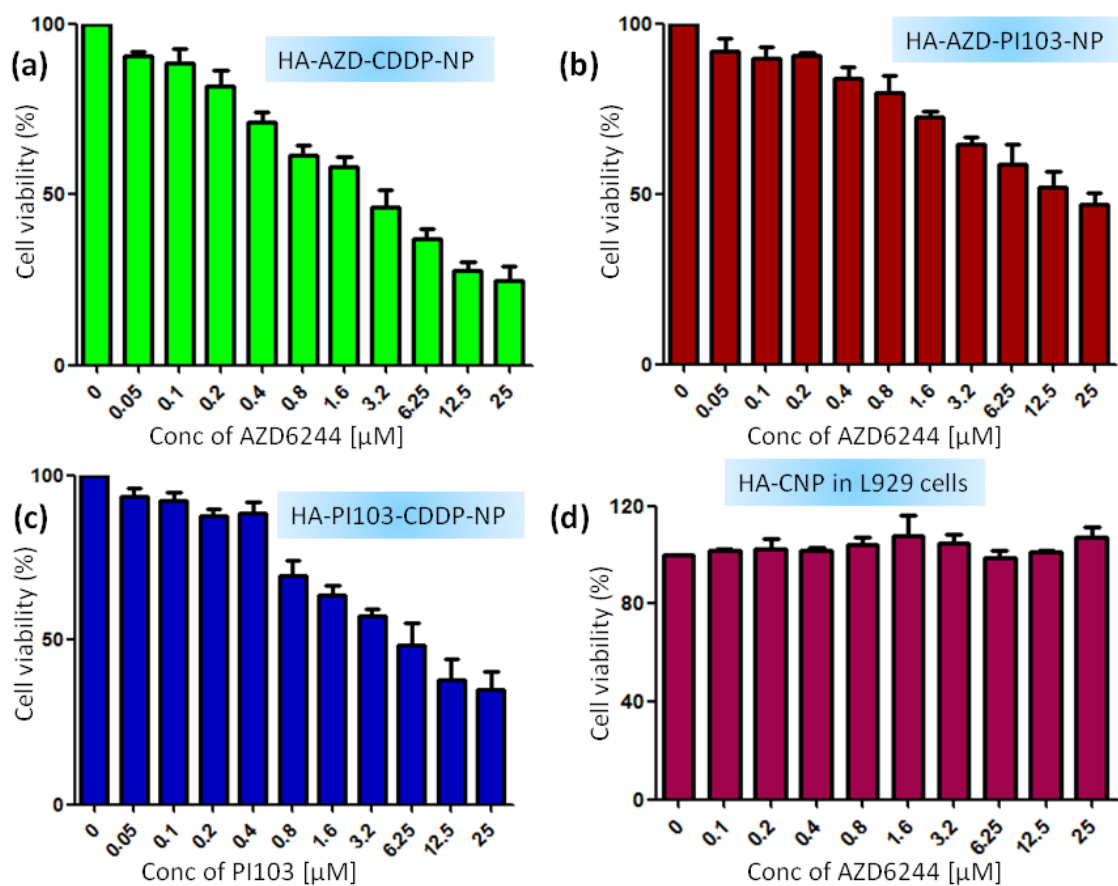

**Figure S17:** Concentration dependent cell viability of (a) HA-AZD-CDDP-NPs, (b) HA-AZD-PI103-NPs, (c) HA-PI103-CDDP-NPs in HCT-116 cells after 24 h determined by MTT assay. (d) Concentration dependent cell viability of HA-CNPs in L929 fibroblast cells at 24 h post treatment determined by MTT assay.

| Treatment Time (h)                  | Image Channels                    |                                     |        |                                |
|-------------------------------------|-----------------------------------|-------------------------------------|--------|--------------------------------|
|                                     | C1 (red), C2 (green)              |                                     |        |                                |
|                                     | Pearson's Correlation Coefficient | Manders Coefficients                |        | Percent volume co-localization |
| M1 (fraction of C1 over-lapping C2) |                                   | M2 (fraction of C2 over-lapping C1) |        |                                |
| 1                                   | 0.9741                            | 0.8997                              | 0.9126 | 77.3                           |
| 3                                   | 0.9476                            | 0.6499                              | 0.6676 | 40.62                          |
| 6                                   | 0.978                             | 0.7521                              | 0.7966 | 23.44                          |

**Table S1:** Quantification of homing of FITC-HA-CNPs into lysosomes stained with LysoTracker Red from CLSM.
